# Supplementary material
Source: PubMed Central journal article supplement (PMC7774281)
Supplement: ao0c04925_si_001.pdf [file ao0c04925_si_001.pdf]

# **Doxorubicin Dimerization Causes the Precipitation of Doxorubicin**

Yuji Yamada

Department of Clinical Biochemistry, School of Pharmacy, Tokyo University of Pharmacy and Life Sciences, Hachioji, Tokyo 192-0392, Japan.

| <b>Supporting Information Table of Contents</b>                                | <b>Page</b> |
|--------------------------------------------------------------------------------|-------------|
| Figure S1. Number of publications of doxorubicin delivery study                | 2           |
| Figure S2. Mass spectrum of DOX, the DOX monomer derivative, and the DOX dimer | 3           |
| Figure S3. Mass spectrum of DOX oxime and oxidized DOX oxime                   | 4           |
| Figure S4. NMR spectra of oxidized DOX oxime                                   | 5           |
| Figure S5. Nitroblue tetrazolium (NBT) test                                    | 6           |
| Figure S6. Mass spectrum and chromatogram of DOX precipitate formed by heparin | 7           |

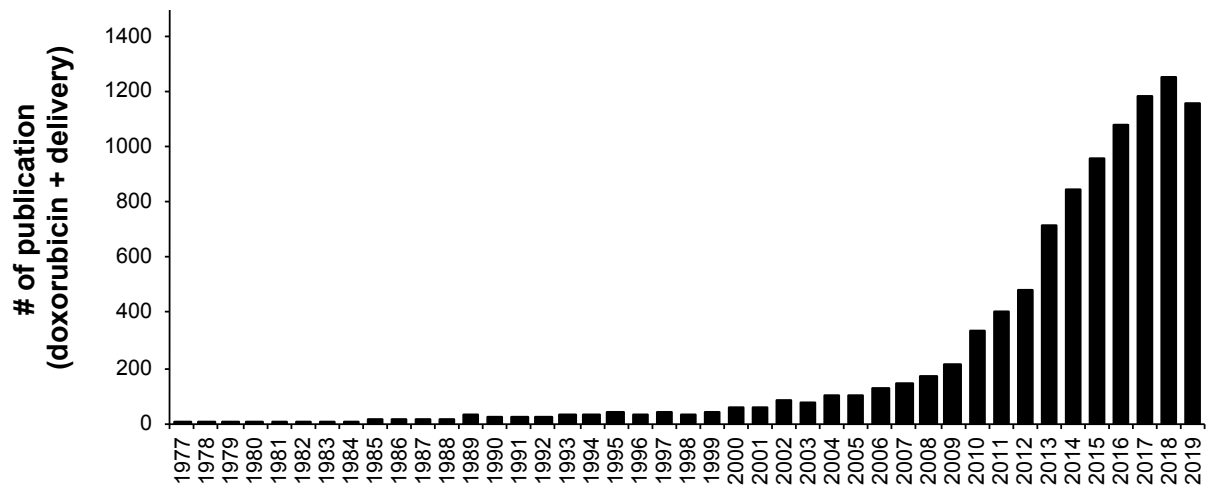

**Figure S1.** Number of publications of doxorubicin delivery study searched by PubMed (doxorubicin + delivery). Data retrieved: September 23, 2020.

**A**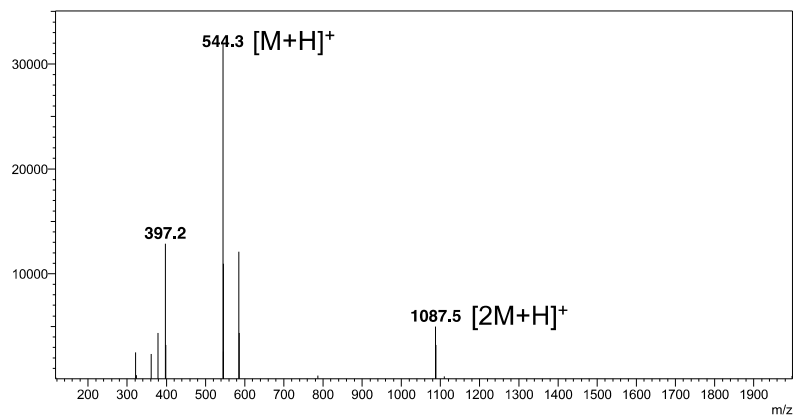**B**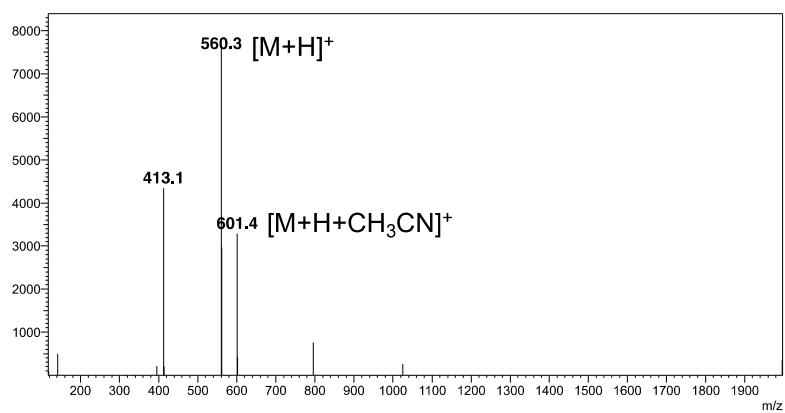**C**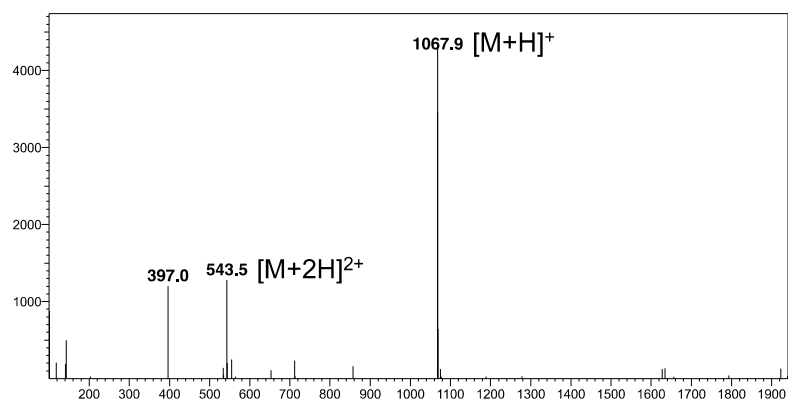

**Figure S2.** Mass spectrum of DOX (A), the DOX monomer derivative (B), and the DOX dimer (C) analyzed using LC/MS (shown in Fig. 2D).

**A**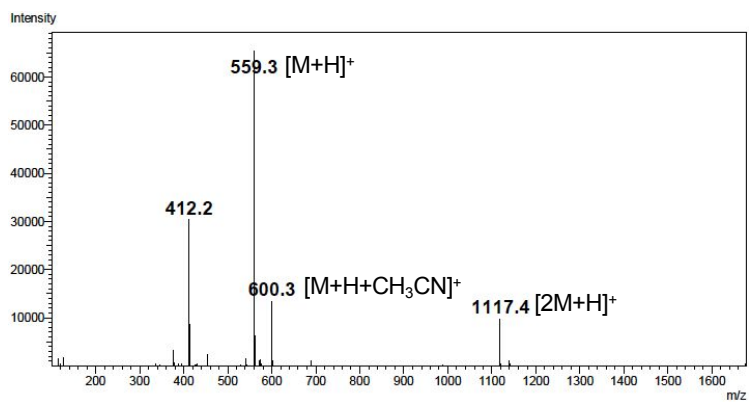**B**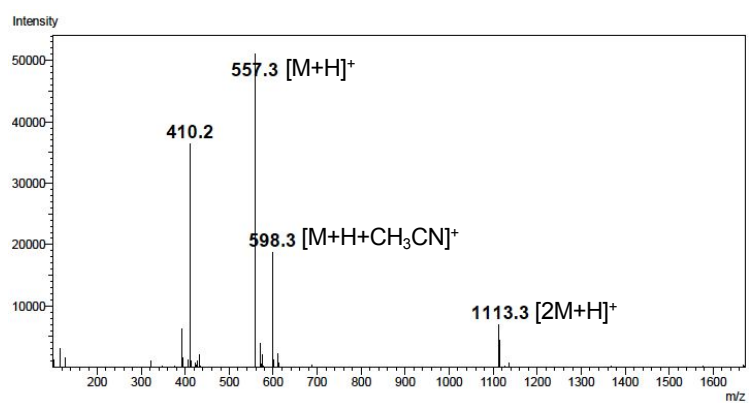

**Figure S3.** Mass spectrum of DOX oxime (A) and oxidized DOX oxime (B) shown in figure 4A.

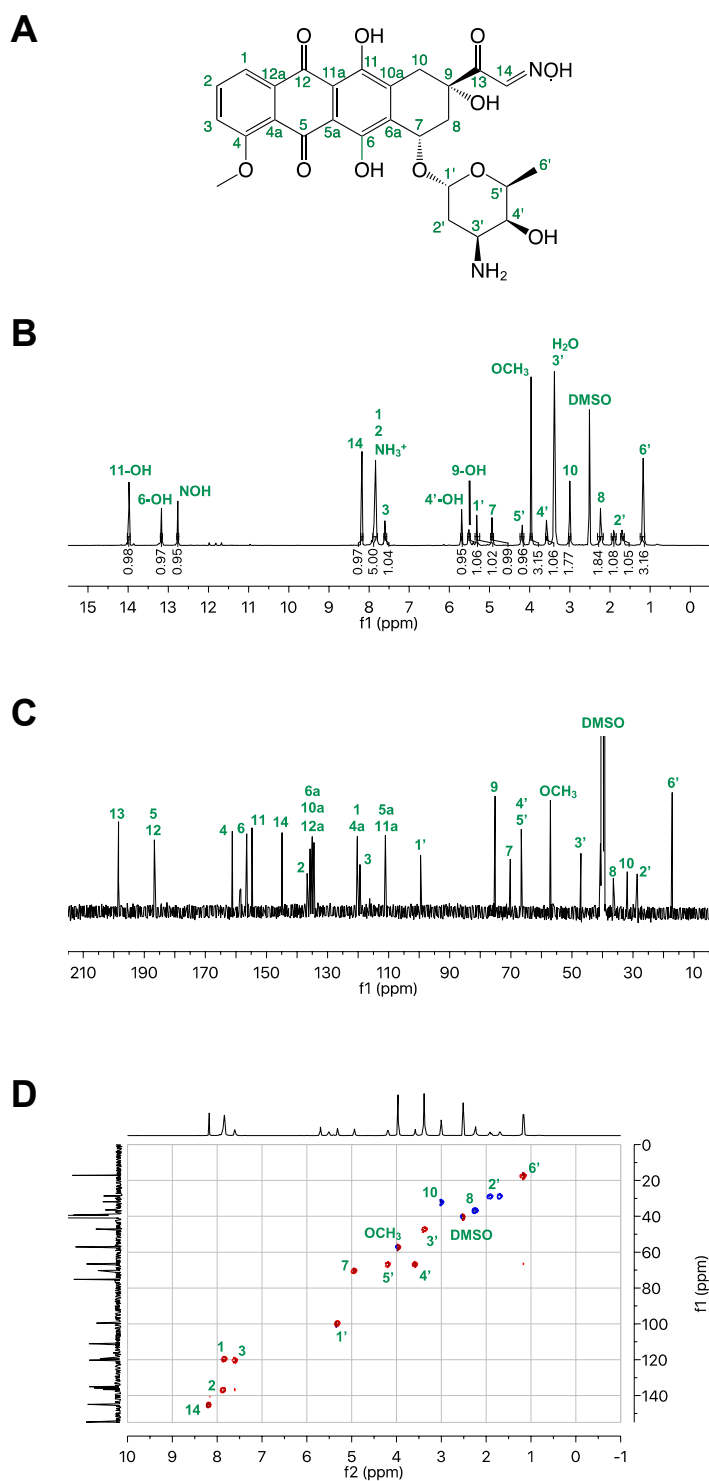

**Figure S4.** NMR spectra of oxidized DOX oxime. (A) Structure of oxidized DOX oxime. (B)  $^1\text{H}$ -NMR spectrum. (C)  $^{13}\text{C}$ -NMR spectrum. (D)  $^1\text{H}$ - $^{13}\text{C}$  HSQC spectrum.

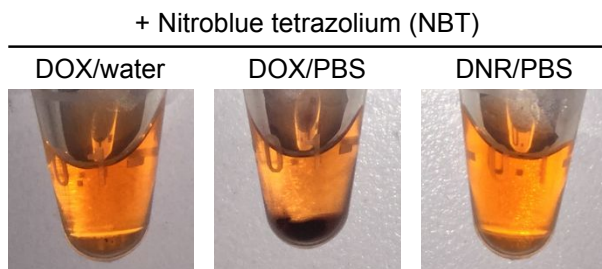

**Figure S5.** Nitroblue tetrazolium (NBT) test. NBT (VWR, Radnor, PA, USA) was added to 1 mg/mL DOX in PBS, DOX in water, and DNR in PBS at final concentration of 0.5 mg/mL and incubated for 24 h at 37°C.

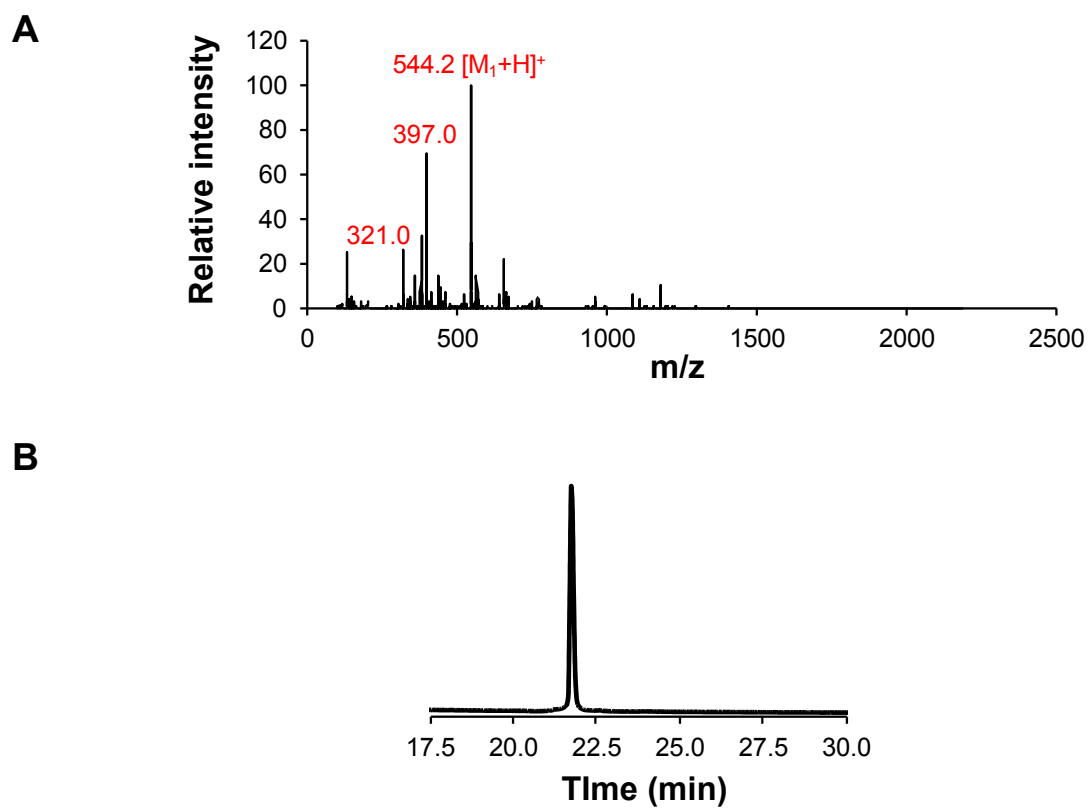

**Figure S6.** Mass spectrum (A) and HPLC chromatogram (B) of DOX precipitate formed by mixing with heparin.
